# Supplementary material
Source: PubMed Central journal article supplement (PMC446102)
Supplement: jvirol_78_15_8229__1.pdf [file jvirol_78_15_8229__1.pdf]

Supplemental Table 1. Genes associated with pancreatic growth and development whose expression increased during CVB4 infection

| Gene name                                        | Gene product                                   | Relevant Function                                                          |
|--------------------------------------------------|------------------------------------------------|----------------------------------------------------------------------------|
| <b>Embryonic expression</b>                      |                                                |                                                                            |
| <i>Apod</i>                                      | apolipoprotein D                               | Secreted protein, lipocalin family, role in embryogenesis                  |
| <b>Growth and differentiation signals</b>        |                                                |                                                                            |
| <i>Ngrn-pending<sup>P</sup></i>                  | neugrin                                        | Neuronal differentiation                                                   |
| <i>Ccnd1</i>                                     | cyclin D1                                      | G1/S phase transition, cell cycle control                                  |
| <i>Sparc</i>                                     | secreted acidic cysteine rich glycoprotein     | Matricellular protein, inhibits cell proliferation and increases ECM       |
| <i>Unc93b</i>                                    | unc93 homolog B                                | Cell-to-cell communication, tumor suppressor gene? normal function?        |
| <i>Nisch</i>                                     | nischarin                                      | Inhibits cell proliferation via cytoskeleton organization                  |
| <i>Igfbp5</i>                                    | insulin-like growth factor binding             | Modulate IGF actions, role in tissue development                           |
| <b>Apoptosis</b>                                 |                                                |                                                                            |
| <sup>1</sup> <i>Reg3g<sup>P</sup></i> •          | regenerating islet-derived 3 gamma             | Inhibits apoptosis                                                         |
| <sup>1</sup> <i>Pap (reg2)<sup>P</sup></i>       | pancreatitis-associated protein                | Inhibits apoptosis                                                         |
| <i>Bcl2a1b</i>                                   | B-cell leukemia/lymphoma 2 related             | Related to BCL-2, pro-apoptosis                                            |
| <i>Bcl2a1d</i>                                   | B-cell leukemia/lymphoma 2 related             | Related to BCL-2, pro-apoptosis                                            |
| <i>Biklk</i>                                     | Bcl2-interacting killer-like                   | Interacts with BCL2 and BCL-XL, pro-apoptosis                              |
| <i>Bnip2</i>                                     | BCL2/adenovirus E1B 19 kDa-interacting protein | Activation of caspase 3, pro-apoptotic gene                                |
| <i>Bak1</i>                                      | BCL2-antagonist/killer 1                       | BCL-2 homolog, potent inducer of apoptosis                                 |
| <sup>1</sup> <i>Ctsb</i>                         | cathepsin B                                    | Lysosomal protease, possible role in TNF-induced cell death signaling      |
| <i>Cdkn1c</i>                                    | cyclin-dependent kinase inhibitor              | Similarly to p53 in the ability to induce cell-cycle arrest and apoptosis, |
| <i>Rtn4</i>                                      | reticulon 4                                    | Role in regulating apoptosis                                               |
| <i>Prkcd</i>                                     | protein kinase C, delta                        | Required for mitochondrial-dependent apoptosis                             |
| <i>Apaf1</i>                                     | apoptotic protease activating factor           | Role in apoptosis, activator of caspase family proteases                   |
| <sup>1</sup> <i>Tieg</i>                         | TGFB inducible early growth                    | Transcription factor, TGF-beta signaling, analogous to SMAD                |
| <sup>1</sup> <i>Tnfrsf1a</i>                     | tumor necrosis factor receptor                 | TNFR1 signaling, apoptosis                                                 |
| <sup>1</sup> <i>Tnfrsf1b</i>                     | tumor necrosis factor receptor                 | Pro-inflammatory, TNF signaling induction, apoptosis, growth               |
| <b>Serine proteases / serpins</b>                |                                                |                                                                            |
| <sup>1</sup> <i>Klk 6,9,13,16,26<sup>P</sup></i> | kallikreins                                    |                                                                            |
| <sup>1</sup> <i>Spint1<sup>P</sup></i>           | serine protease inhibitor, Kunit               | Serpin                                                                     |
| <sup>1</sup> <i>Spi6<sup>P</sup></i>             | serine protease inhibitor 6                    | Serpin                                                                     |
| <i>Adn</i>                                       | adipsin                                        | Adipocyte differentiation-dependent serine protease gene                   |
| <i>Kdap</i>                                      | kidney-derived aspartic protease-like          | Aspartic proteinase-like                                                   |
| <i>Ambp</i>                                      | alpha 1 microglobulin/bikunin                  | Serpin                                                                     |
| <i>Serpina3n</i>                                 | serine (or cysteine) proteinase                | Serpin-encoding gene family, expressed during mouse fetal development      |
| <b>Acinoductular metaplasia</b>                  |                                                |                                                                            |
| <sup>1</sup> <i>Mmp7</i> •                       | matrix metalloproteinase 7                     | Homeostasis and remodeling of ECM, acinoductular metaplasia                |
| <i>Lgals3</i>                                    | lectin, galactose binding, soluble 3           | Growth regulation, cell adhesion, ductular complex formation               |
| <i>Iqgap1</i>                                    | IQ motif containing GTPase activity            | Potential target of S100b during membrane rearrangement                    |

Supplemental Table 1. Genes associated with pancreatic growth and development whose expression increased during CVB4 infection (ctd)

| Gene name                                         | Gene product                             | Relevant Function                                                      |
|---------------------------------------------------|------------------------------------------|------------------------------------------------------------------------|
| <b>Angiogenesis / blood</b>                       |                                          |                                                                        |
| <sup>1</sup> <i>Klk 6,9,13,16,26</i> <sup>P</sup> | kallikreins                              |                                                                        |
| <i>Bpgm</i> <sup>P</sup>                          | 2,3-bisphosphoglycerate mutase           | Dissociation of oxygen from hemoglobin                                 |
| <i>Hbb-b1</i> <sup>P</sup>                        | hemoglobin, beta adult major chain       | Blood                                                                  |
| <i>Ptafr</i> <sup>P</sup>                         | platelet-activating factor receptor      | Coagulation                                                            |
| <sup>1</sup> <i>Procr</i> <sup>P•</sup>           | protein C receptor, endothelial          | Enhances activation of anticoagulant protein C                         |
| <sup>1</sup> <i>Spint1</i> <sup>P</sup>           | serine protease inhibitor, Kunitz type 1 | Serpin                                                                 |
| <sup>1</sup> <i>Spi6</i> <sup>P</sup>             | serine protease inhibitor 6              | Serpin                                                                 |
| <i>Figf</i>                                       | c-fos induced growth factor              | Potent angiogenic factor                                               |
| <i>Tie1</i>                                       | tyrosine kinase receptor 1               | Expressed in endothelial cells during embryonic angiogenesis           |
| <i>Lcp2</i>                                       | lymphocyte cytosolic protein 2           | Roles in lymphatic vessel development                                  |
| <i>Timp3</i>                                      | tissue inhibitor of metalloproteinase    | Balance between tissue degradation / remodeling, inhibits angiogenesis |
| <b>Nervous system</b>                             |                                          |                                                                        |
| <i>Shyc</i>                                       | selective hybridizing clone              | Nervous system development, neuronal cells expression                  |
| <i>App</i>                                        | amyloid beta (A4) precursor protein      | Nerve derivative                                                       |
| <i>Stxbp3</i>                                     | syntaxin binding protein 3               | Neuronal specific                                                      |
| <i>Ninj1</i>                                      | ninjurin 1                               | Promotes neuron/epithelial cell growth and migration                   |
| <i>P2rx4</i>                                      | purinergic receptor P2X, ligand-g        | Mediates extracellular ATP-induced effects                             |
| <i>Sema4d</i>                                     | sema domain, immuno globulin domain      | Axon guidance? Also on various hemopoetic cell types                   |
| <sup>1</sup> <i>Pmp22</i>                         | peripheral myelin protein, 22 kDa        | Progenitor cells that produce neurons and smooth muscle- like cells    |
| <b>Bone</b>                                       |                                          |                                                                        |
| <i>Atp6v1b2</i>                                   | ATPase, H+ transporting                  | Role in bone resorption                                                |
| <i>Atp6v1a1</i>                                   | ATPase, H+ transporting                  | Bone resorption                                                        |
| <i>Atp6v0c</i>                                    | ATPase, H+ transporting                  | Bone resorption                                                        |
| <i>Mglap</i>                                      | matrix gamma-carboxyglutamate            | Role in endochondral ossification? expressed during embryogenesis      |
| <i>Ewsh</i>                                       | Ewing sarcoma homolog                    | Encodes a putative RNA binding protein, expressed during development   |

<sup>P</sup>, indicates a gene whose expression was greater during CVB4-P infection. All other genes were expressed at higher levels during CVB4-V infection. <sup>1</sup>, present in more than one category. •, most significant outliers (p>0.001).

Supplemental Table 2. Genes associated with extracellular matrix formation whose expression was increased during CVB4 infection

| Gene name                                         | Gene product                               | Relevant Function                                                                                                                 |
|---------------------------------------------------|--------------------------------------------|-----------------------------------------------------------------------------------------------------------------------------------|
| <b>Extracellular matrix / adhesion</b>            |                                            |                                                                                                                                   |
| <i>Cldn3,4,7<sup>P</sup></i>                      | claudins 3, 4, 7                           | Tight junctions                                                                                                                   |
| <b>Fibrosis</b>                                   |                                            |                                                                                                                                   |
| <i>Col15a1</i>                                    | procollagen, type XV                       | Extracellular matrix                                                                                                              |
| <i>Col1a1</i>                                     | procollagen, type I, alpha 1               | Extracellular matrix and connective tissue                                                                                        |
| <i>Col1a2</i>                                     | procollagen, type I, alpha 2               | Fibrosis, extracellular matrix                                                                                                    |
| <i>Col4a1</i>                                     | procollagen, type IV, alpha 1              | Fibrosis, extracellular matrix                                                                                                    |
| <i>Col4a2</i>                                     | procollagen, type IV, alpha 2              | Extracellular matrix, fibrosis                                                                                                    |
| <i>Col3a1</i>                                     | procollagen, type III, alpha 1             | Fibrosis, extracellular matrix                                                                                                    |
| <i>Col6a1</i>                                     | procollagen, type VI, alpha 1              | Fibrosis, extracellular matrix                                                                                                    |
| <i>Col6a3</i>                                     | procollagen, type VI, alpha 3              | Fibrosis, extracellular matrix                                                                                                    |
| <i>Col6a2</i>                                     | procollagen, type VI, alpha 2              | Extracellular matrix, expressed during mouse development                                                                          |
| <i>Fbn1</i>                                       | fibrillin 1                                | Component of fibroid formation, fibrosis                                                                                          |
| <i>Fbln2</i>                                      | fibulin 2                                  | Extracellular matrix protein, suggested role in organogenesis                                                                     |
| <b>ECM formation</b>                              |                                            |                                                                                                                                   |
| <i>Grn</i>                                        | granulin                                   | Wound-related growth factor, mitogenic for keratinocytes and fibroblasts                                                          |
| <i>Sdfr2</i>                                      | stromal cell derived factor receptor       | Receptor for SDF-1, growth factor                                                                                                 |
| <i>Dcn</i>                                        | decorin                                    | Proteoglycan, growth-factor role in tissue remodeling and cancer                                                                  |
| <i>Bgn</i>                                        | biglycan                                   | TGFbeta1-induced formation of extracellular matrix                                                                                |
| <sup>1</sup> <i>Sparc</i>                         | secreted acidic cysteine rich glycoprotein | Matricellular protein, inhibits cell proliferation, increases ECM by regulating TGFbeta1 and type 1 collagens; arrest cells in G1 |
| <i>Sparc11</i>                                    | SPARC-like 1 (mast9, hevin)                | ECM glycoprotein, regulates cell adhesion, cell cycle                                                                             |
| <b>Remodeling ECM</b>                             |                                            |                                                                                                                                   |
| <sup>1</sup> <i>Mmp7</i>                          | matrix metalloproteinase 7                 | Remodeling ECM; acinoductular metaplasia                                                                                          |
| <i>Mmp14</i>                                      | matrix metalloproteinase 14                | Proteinase involved in ECM breakdown/ remodeling                                                                                  |
| <i>Timp3</i>                                      | tissue inhibitor of metalloproteinase      | Tissue specific inhibitor of Mmps, inhibits angiogenesis                                                                          |
| <i>Anxa2</i>                                      | annexin A2                                 | Stress-fiber development, enhances ECM formation, receptor for tPA                                                                |
| <i>Anxa11</i>                                     | annexin A11                                | Plasminogen receptor. Tissue remodeling                                                                                           |
| <i>Saa3</i>                                       | serum amyloid A 3                          | Stimulates collagenase expression, tissue remodeling                                                                              |
| <b>Transforming growth factor beta-associated</b> |                                            |                                                                                                                                   |
| <i>Tgfb1</i>                                      | transforming growth factor, beta           | Fibrosis, inhibits acinar cell mitosis                                                                                            |
| <sup>1</sup> <i>Tieg</i>                          | TGFB inducible early growth                | Transcription factor / TGF-beta signaling pathway, analogous to SMAD                                                              |
| <i>Bgn</i>                                        | biglycan                                   | TGF beta1-induced formation of extracellular matrix                                                                               |
| <sup>1</sup> <i>Sparc</i>                         | secreted acidic cysteine rich glycoprotein | Matricellular protein inhibits cell proliferation, increases ECM                                                                  |
| <sup>1</sup> <i>Tgfb1</i>                         | transforming growth factor, beta           | TGF beta 1 inhibitor                                                                                                              |
| <i>Thbs1</i>                                      | thrombospondin 1                           | Adhesive glycoprotein, cell attachment, spreading, and migration                                                                  |
| <i>Eng</i>                                        | endoglin                                   | TGF beta 1-binding cell-surface glycoprotein, vascular endothelial cells                                                          |
| <i>Emr1</i>                                       | EGF-like module                            | B / T / and macrophages cell surface receptor                                                                                     |
| <i>Fstl</i>                                       | folliculin-like                            | activin-binding protein (inhibitor), induced by TGFbeta1, EGF, KGF                                                                |
| <sup>1</sup> <i>Pmp22</i>                         | peripheral myelin protein, 22 kDa          | Progenitor cells that produce neurons and smooth muscle- like cells                                                               |

Supplemental table 3. Genes associated with tissue injury / response to injury whose expression was increased during CVB4 infection

| Gene name                                  | Gene product                                              | Relevant Function                                                     |
|--------------------------------------------|-----------------------------------------------------------|-----------------------------------------------------------------------|
| <b>Protective role</b>                     |                                                           |                                                                       |
| <i>Gst2</i> <sup>P</sup>                   | glutathione S transferase theta 2                         | Protects from oxidative stress                                        |
| <i>Tm4sf7</i> <sup>P</sup>                 | transmembrane 4 superfamily member 7                      | Wound healing                                                         |
| <b>Autodigestion</b>                       |                                                           |                                                                       |
| <sup>1</sup> <i>Ctsb</i>                   | cathepsin B                                               | Autodigestion of pancreas during pancreatitis                         |
| <i>Pla2g7</i>                              | phospholipase A2 group VII                                | Pancreatic enzyme, increased in necrotic regions during pancreatitis  |
| <b>Coagulation</b>                         |                                                           |                                                                       |
| <i>F7</i>                                  | coagulation factor VII                                    | Plasma serine protease, participates in blood coagulation             |
| <i>F10</i> •                               | coagulation factor X                                      | Plasma protein involved in blood coagulation cascade                  |
| <i>Pros1</i>                               | protein S (alpha)                                         | Plasma protein, functions as a cofactor for activated protein C       |
| <i>Hp</i>                                  | haptoglobin                                               | C-reactive acute -phase protein, increases expression of fibrinogen   |
| <b>Oxidative stress response</b>           |                                                           |                                                                       |
| <i>Sod2</i>                                | superoxide dismutase 2,                                   | Antioxidant                                                           |
| <i>Hmox1</i>                               | heme oxygenase (decycling) 1                              | Stress protein produced by inflammatory cells                         |
| <b>Metabolism</b>                          |                                                           |                                                                       |
| <b>Carbohydrate / insulin</b>              |                                                           |                                                                       |
| <i>Stx4a</i>                               | syntaxin 4A (placental)                                   | Expressed by adipocytes, role in insulin-dependent movement of glut 4 |
| <i>Prkacb</i>                              | protein kinase, cAMP dependent                            | Triggers insulin secretion in beta cells                              |
| <i>Hk2</i>                                 | hexokinase 2                                              | Role in facilitating glucose uptake in response to insulin            |
| <i>Pfkip</i>                               | phosphofructokinase, platelet                             | Phosphofructokinase family, role in glucose metabolism                |
| <i>Prom</i>                                | prominin                                                  | Blood-glucose responsive gene , upregulates expression of GAPDH       |
| <b>Fatty acid / cholesterol metabolism</b> |                                                           |                                                                       |
| <i>ApoE</i>                                | apolipoprotein E                                          | Cholesterol metabolism                                                |
| <i>Npc2</i>                                | Niemann Pick type C2                                      | Role in cholesterol accumulation in lysosomes                         |
| <i>Npc1</i>                                | Niemann Pick type C1                                      | Roles in cholesterol homeostasis                                      |
| <i>Acrp30</i>                              | adipocyte complement                                      | Adipocyte-derived hormone, affects lipid and glucose metabolism       |
| <i>Abca1</i>                               | ATP-binding cassette, sub-family                          |                                                                       |
| <i>Lpl</i>                                 | lipoprotein lipase                                        | Lipid metabolism                                                      |
| <i>Acaa</i>                                | acetyl-Coenzyme A acyltransferase                         | Peroxisomal beta-oxidation system                                     |
| <i>Gdap10</i>                              | ganglioside-induced differentiation associated protein 10 | Signal transduction, glycolipid formation                             |
| <i>Pon2</i>                                | paraoxonase 2                                             | Catalyzes hydrolysis of organophosphates , prevents oxidation of LDL  |
| <i>Spltc2</i>                              | serine palmitoyltransferase                               | Sphingolipid biosynthesis                                             |

Supplemental table 4. Genes associated with immune responses whose expression was increased during CVB4 infection

| Gene name                                         | Gene product                           | Relevant Function                                                      |
|---------------------------------------------------|----------------------------------------|------------------------------------------------------------------------|
| <b>Innate immunity</b>                            |                                        |                                                                        |
| <b>Acute phase proteins</b>                       |                                        |                                                                        |
| <sup>1</sup> <i>Klk 6,9,13,16,26</i> <sup>P</sup> | kallikreins                            | Released during inflammation                                           |
| <sup>1</sup> <i>Reg3g</i> <sup>P</sup> •          | regenerating islet-derived 3 gamma     |                                                                        |
| <sup>1</sup> <i>Pap</i> <sup>P</sup>              | pancreatitis-associated protein        |                                                                        |
| <i>Saa3</i>                                       | serum amyloid A 3                      | NFkB target, stimulate collagenase expression, tissue remodeling       |
| <i>Apbb1ip</i> -<br>pending                       | amyloid beta (A4) precu                | induced by pro-inflammatory cytokines; marker of degeneration?         |
| <i>Hp</i>                                         | haptoglobin                            | C-reactive acute -phase protein, increases expression of fibrinogen    |
| <b>Adhesion / Migration / inflammation</b>        |                                        |                                                                        |
| <i>Lrg</i> - <i>pending</i> <sup>P</sup>          | leucine-rich alpha-2-glycoprotein      | Marker for early neutrophilic granulocyte differentiation              |
| <i>Klra2</i> <sup>P</sup>                         | killer cell lectin-like receptor       | NK cell receptor. Inhibitory                                           |
| <sup>1</sup> <i>Procr</i> <sup>P</sup> •          | protein C receptor, endothelial        | Protection from sepsis. Anti-inflammatory                              |
| <i>Itgb2</i>                                      | integrin beta 2                        | Neutrophil activation                                                  |
| <i>Itgp</i>                                       | integrin-associated protein            | Hematopoietic cell signaling                                           |
| <i>Cd9</i>                                        | CD9 antigen                            | Cell motility/ adhesion/ spreading, signal transduction, wound healing |
| <i>Tm4sf7</i>                                     | transmembrane 4 superfamily            | Cell adhesion, migration, proliferation and differentiation            |
| <i>Tln</i>                                        | talin                                  | Cytoskeleton organization, cell migration/adhesion                     |
| <i>Thbs1</i>                                      | thrombospondin 1                       | Cell attachment, spreading, and migration                              |
| <i>Actr2</i>                                      | ARP2 actin-related protein 2 homo      | Migration and movement                                                 |
| <i>Vcam1</i>                                      | vascular cell adhesion molecule 1      | Adhesion molecule involved in cell mobility and recruitment            |
| <i>Icam1</i>                                      | intercellular adhesion                 | Adhesion molecule, lymphocyte mobility and recruitment                 |
| <i>Adam8</i>                                      | a disintegrin and metalloprotease      | Cell adhesion/signaling                                                |
| <i>Selpl</i>                                      | selectin, platelet(p-selectin) 1       | Recruitment and chemotaxis                                             |
| <i>Ctsc</i> •                                     | cathepsin C                            | Leukocyte recruitment, regulate cytokine production                    |
| <i>Chi3l3</i> •                                   | chitinase 3-like 3                     | Chemotactic, extravasion of eosinophils, T cells, bone marrow-PMNs     |
| <i>Sdcbp</i>                                      | syndecan binding protein               | Signaling/chemotaxis of leukocytes                                     |
| <i>Myh9</i>                                       | myosin heavy chain IX                  | Secretion and migration of mast cells                                  |
| <i>Pglyrp</i>                                     | peptidoglycan recognition protein      | ubiquitous proteins involved in innate immunity                        |
| <i>Cebpb</i>                                      | CCAAT/enhancer binding protein         | Transcription factors, pro-inflammatory                                |
| <i>Gp49b</i>                                      | glycoprotein 49 B                      | Surface glycoprotein on mast cells                                     |
| <i>Ierepo1</i> -<br>pending                       | immediate early response               | Pro-inflammatory, innate                                               |
| <i>Emp3</i>                                       | epithelial membrane protein 3          | Expressed in hematopoietic/lymphoid lineage cells,                     |
| <b>Complement</b>                                 |                                        |                                                                        |
| <i>Clqb</i>                                       | complement component 1, q subcomponent | Innate immunity                                                        |
| <i>Clqc</i>                                       | complement component 1, q subcomponent | Innate immunity                                                        |
| <i>Clqa</i>                                       | complement component 1, q subcomponent | Innate immunity                                                        |
| <i>Clqr1</i>                                      | complement component 1, q subcomponent | Innate immunity                                                        |
| <i>C3ar1</i>                                      | complement component 3a receptor       | Regulator of innate immunity, regulatory role in Th2 development       |

Supplemental table 4. Genes associated with immune responses whose expression was increased during CVB4 infection (ctd)

| Gene name                       | Gene product                                                           | Relevant Function                                                       |
|---------------------------------|------------------------------------------------------------------------|-------------------------------------------------------------------------|
| <b>Cytokines and chemokines</b> |                                                                        |                                                                         |
| <i>Ccl8</i> <sup>P</sup>        | chemokine (C-C motif) ligand 8                                         | MCP-2                                                                   |
| <i>Ccl7</i>                     | chemokine (C-C motif) ligand 7                                         | MCP-3                                                                   |
| <i>Cxcl10</i>                   | chemokine (C-X-C motif) ligand 1                                       | IP-10, chemotactic for monocytes/macrophages, T cells; M1, angiostatic? |
| <i>Cxcl2</i>                    | chemokine (C-X-C motif) ligand 2                                       | MIP-2, iNOS stimulates expression                                       |
| <i>Ccl3</i>                     | chemokine (C-C motif) ligand 3                                         | MIP-1alpha, induced by IFN-alpha/beta                                   |
| <i>Ccl4</i>                     | chemokine (C-C motif) ligand 4                                         | MIP-1beta, chemotactic activity for lymphocytes                         |
| <i>Ccl5</i>                     | chemokine (C-C motif) ligand 5                                         | Expressed by M1 macrophages                                             |
| <i>Cxcl9</i>                    | chemokine (C-X-C motif) ligand 9                                       | MIG, increased during M1 macrophage activation                          |
| <i><sup>1</sup>Tgfb1</i>        | transforming growth factor, beta                                       | TGF beta 1 inhibitor                                                    |
| <i>Cmkbr5</i>                   | chemokine (C-C) receptor 5                                             | Increases responsiveness of murine eosinophils to MIP-1beta             |
| <i>Il17r</i>                    | interleukin 17 receptor                                                | Ligand (IL-17) proinflammatory                                          |
| <i>Ptpns1</i>                   | protein tyrosine phosphatase, non-receptor type substrate 1            | Cytokine signal transduction                                            |
| <i><sup>1</sup>Tnfrsf1b</i>     | tumor necrosis factor receptor                                         | Pro-inflammatory, TNF signaling induction, apoptosis, growth            |
| <i><sup>1</sup>Tnfrsf1a</i>     | tumor necrosis factor receptor                                         | TNFR1 signaling, apoptosis                                              |
| <i>Nek7</i>                     | NIMA (never in mitosis gene a)-related expressed kinase 7              | Immediate-early cytokine responsive gene                                |
| <i>Peli1</i>                    | pellino 1                                                              | May have roles in IL-1 dependent signaling                              |
| <b>Interferon- related</b>      |                                                                        |                                                                         |
| <i>Ifi202a</i> <sup>P</sup>     | interferon activated gene 202A                                         | Negative role in cell growth                                            |
| <i>Ifrd2</i> <sup>P</sup>       | interferon-related developmental                                       | Cell proliferation                                                      |
| <i>Gbp1</i> <sup>P</sup>        | guanylate nucleotide binding protein                                   | GTPase                                                                  |
| <i>Ifi205</i>                   | interferon activated gene 205                                          | Interferon-induced nuclear factor, overexpression decreases cell growth |
| <i>Ifi204</i>                   | interferon activated gene 204                                          | p200 family, interferon-induced                                         |
| <i>Mx1</i>                      | myxovirus (influenza virus) resistance 1, interferon-inducible protein | Interferon-induced, antiviral, GTPase, amplified via IRF& IRF3          |
| <i>Gbp2</i>                     | guanylate nucleotide binding protein                                   | Interferon-induced, G-protein, antiviral effects                        |
| <i>Ifit3</i>                    | interferon-induced protein with tetratricopeptide repeats 3            | In peritoneal macrophages, pro-inflammatory                             |
| <i>Ifit2</i>                    | interferon-induced protein with tetratricopeptide repeats 2            | Expressed in peritoneal macrophages, pro-inflammatory                   |
| <b>Macrophages</b>              |                                                                        |                                                                         |
| <i>Gc</i> <sup>P</sup>          | group specific component                                               | Macrophage activation                                                   |
| <i>Arg1</i>                     | arginase 1, liver                                                      | M1 macrophages?                                                         |
| <i>Irg1</i>                     | immunoresponsive gene 1                                                | Activated macrophages                                                   |
| <i>Il1rn</i>                    | interleukin 1 receptor antagonist                                      | Immune modulation, expressed by M2 macrophages, NFkB target             |
| <i>Gp49a</i>                    | glycoprotein 49 A                                                      | Ig-like receptor on mast cells, NK cells, macrophages                   |
| <i>Samhd1</i>                   | SAM domain and HD domain, 1                                            | Pro-inflammatory, innate, macrophage activation                         |
| <i>Spp1</i>                     | secreted phosphoprotein 1                                              | Osteropontin, activated macrophages                                     |
| <i>Litaf</i>                    | LPS-induced TN factor                                                  | Regulate TNF alpha gene expression in macrophages                       |
| <i>Tmsb10</i>                   | thymosin, beta 10                                                      | Activate bone marrow-derived macrophages → iNOS, TNF alpha, IL-1        |
| <i>Rbm3</i>                     | RNA binding motif protein 3                                            | Role in proliferation and monocyte differentiation                      |
| <i>Slc11a1</i>                  | solute carrier family 11                                               | Regulate macrophage function, expressed during neutrophil maturation    |
| <i>Clecsf8</i>                  | C-type lectin superfamily 8                                            | On macrophages and dendritic cells                                      |
| <i>Mpeg1</i>                    | macrophage expressed gene 1                                            |                                                                         |
| <i>Serpinb2</i>                 | serine (or cysteine) proteinase inhibitor                              | Serpin, expressed by monocytes, macrophages                             |
| <i>Clecsf9</i>                  | C-type lectin superfamily 9                                            | Role in activating macrophages, expression increased by IL-6, IFN-g     |
| <i>Clecsf6</i>                  | C-type lectin superfamily 6                                            | Surface molecule expressed by APCs, potential regulator of DC function  |
| <i>Irg1</i>                     | immunoresponsive gene 1                                                | Expression regulated by IFN-alpha, expressed by macrophages             |
| <i>Ptpro</i>                    | protein tyrosine phosphatase, receptor type O                          | May play a role in macrophage survival, and/or differentiation          |

Supplemental table 4. Genes associated with immune responses whose expression was increased during CVB4 infection (ctd)

| Gene name                                         | Gene product                                                | Relevant Function                                                          |
|---------------------------------------------------|-------------------------------------------------------------|----------------------------------------------------------------------------|
| <b>Immune regulation</b> (mainly innate response) |                                                             |                                                                            |
| <i>Ctsk</i>                                       | cathepsin K                                                 | May regulate inflammatory reactions                                        |
| <i>Pla2g7</i>                                     | phospholipase A2 group VII                                  | Pancreatic enzymes, may have role in modulating immune response            |
| <i>Hck</i>                                        | hemopoietic cell kinase                                     | Enhanced innate immune response                                            |
| <i>Csf1r</i>                                      | colony stimulating factor 1 receptor                        | Regulator of mononuclear phagocyte production                              |
| <i>Csf2rb2</i>                                    | colony stimulating factor 2 receptor                        | Negative regulator of signaling in immune cells                            |
| <i>Ptx3</i>                                       | pentaxin related gene                                       | Roles in controlling acute phase inflammatory response                     |
| <i>H2-T10</i>                                     | histocompatibility 2, T region 1                            | Immunoregulatory ( * T cells, transduce a negative signal to NK cells      |
| <i>H2-T23</i>                                     | histocompatibility 2, T region 1                            | Encodes Qa-1 molecule, " \$ T and ( * T cells, negative signal to NK cells |
| <b>Adaptive immunity</b>                          |                                                             |                                                                            |
| <b>B cells</b>                                    |                                                             |                                                                            |
| <i>Pigr<sup>P</sup></i>                           | polymeric immunoglobulin receptor                           | B cells                                                                    |
| <i>Igj<sup>P</sup></i>                            | immunoglobulin joining chain                                | B cells                                                                    |
| <i>Igk-V8<sup>P</sup></i>                         | immunoglobulin kappa chain V8                               | Ig light chain                                                             |
| <i>Laptm5</i>                                     | lysosomal-associated protein transmembrane 5                | Increased in resting B cells, decreased in activated B cells               |
| <i>Cd72</i>                                       | CD72 antigen                                                | Immune activation, B cell antigen receptor                                 |
| <i>Sema4d</i>                                     | sema domain, immunoglobulin domain                          | Surface proteins on lymphocytes, may have role in the immune system        |
| <i>Ly86</i>                                       | lymphocyte antigen 86                                       | Growth-promoting signals to B cells, role in B cell autoantibody prod'n?   |
| <i>Ly9</i>                                        | lymphocyte antigen 9                                        | Expressed on NK, B and T cells, marker of lymphocyte differentiation       |
| <i>Pirb</i>                                       | paired-Ig-like receptor B                                   | Ig-like surface receptor, inhibits inflammation and humoral responses      |
| <i><sup>1</sup>Il7r</i>                           | interleukin 7 receptor                                      | Growth factor for B and T cell precursors                                  |
| <i>Lsp1</i>                                       | lymphocyte specific 1                                       | Marker of activated lymphocytes                                            |
| <b>T cells</b>                                    |                                                             |                                                                            |
| <i>Pnp</i>                                        | purine-nucleoside phosphorylase                             | Role in T cell development                                                 |
| <i>Lcp1</i>                                       | lymphocyte cytosolic protein 1                              | Increased expression in IL-2 stimulated T cells                            |
| <i>Slfn2</i>                                      | schlafen 2                                                  | Role in later thymocyte maturation                                         |
| <i>Bat1a</i>                                      | HLA-B-associated transcript 1A                              | RNA helicase DEAD-box protein family, protein processing                   |
| <i>Slfn1</i>                                      | schlafen 1                                                  | Role in early thymocyte maturation                                         |
| <i>Sgpl1</i>                                      | sphingosine phosphate lyase 1                               | T cell migration into tissue site, regulate T cell proliferation           |
| <i>Ptpn1</i>                                      | protein tyrosine phosphatase, non-receptor type 1           | hematopoietic tumor-suppressor gene                                        |
| <i>Ncl</i>                                        | nucleolin                                                   | T cell activation augmented by TCR/CD3-mediated signaling                  |
| <i>Hsd17b11</i>                                   | hydroxysteroid (17-beta) dehydrogenase 11                   | Expressed on T lymphocytes,                                                |
| <i>Zfp3612</i>                                    | zinc finger protein 36                                      | Possible role in T cell proliferation                                      |
| <i>Ptpns1</i>                                     | protein tyrosine phosphatase, non-receptor type substrate 1 | Recognition/signaling receptor in both the immune and nervous systems      |
| <i>Fkbp5</i>                                      | FK506 binding protein 5 (51 kDa)                            | Immunophilin,, mediate calcineurin inhibition in T cells                   |
| <i><sup>1</sup>Il7r</i>                           | interleukin 7 receptor                                      | Growth factor for B and T cell precursors                                  |
| <i>Lsp1</i>                                       | lymphocyte specific 1                                       | Marker of activated lymphocytes                                            |
| <i>Thy1</i>                                       | thymus cell antigen 1, theta                                | Upregulated on activated lymphocytes                                       |
| <b>Antigen processing /presentation</b>           |                                                             |                                                                            |
| <i>Ehd1</i>                                       | EH-domain containing 1                                      | Role in recycling the MHC class I molecules to the plasma membrane         |

Supplemental table 5. Genes associated with transcriptional regulation whose expression was increased during CVB4 infection

| Gene name                             | Gene product                                           | Relevant Function                                                       |
|---------------------------------------|--------------------------------------------------------|-------------------------------------------------------------------------|
| <b>Pathways (MAP, NFKb, JAK/STAT)</b> |                                                        |                                                                         |
| <i>Csrp2</i> <sup>P</sup>             | cysteine-rich protein 2                                | JAK-STAT signaling                                                      |
| <i>Stat6</i>                          | signal transducer and activator of transcription       | T-cell activation                                                       |
| <i>Tank</i>                           | TRAF family member-associated Nfkb activator           | NFkB activation                                                         |
| <i>Nfkbia</i>                         | nuclear factor of kappa light chain                    | Inhibitor of NFKb activation, blocks receptor signaling                 |
| <i>Dusp1</i>                          | dual specificity phosphatase 1                         | MAP kinase phosphatase (MKP1), involved in ERK signaling pathway        |
| <i>Mapk6</i>                          | mitogen-activated protein kinase                       | Extracellular signal-regulated kinase (ERK3)                            |
| <i>Mapkapk2</i>                       | MAP kinase-activated protein kinase                    | Central role in inflammatory response-signal transduction               |
| <i>Stk10</i>                          | serine/threonine kinase 10                             | Roles in MAPK, extracellular signal transduction                        |
| <i>Osmr</i>                           | oncostatin receptor                                    | Activate Jak1, Jak2, Tyk2 receptor-associated tyrosine kinases, STAT3,5 |
| <b>Transcription</b>                  |                                                        |                                                                         |
| <i>Npm3</i> <sup>P</sup>              | nucleoplasmin 3                                        | Nuclear chaperone. Transcription. DNA replication                       |
| <i>Hnrpc</i> <sup>P</sup>             | heterogeneous nuclear ribonucleoprotein C              | Post-transcriptional regulation                                         |
| <i>Anp32a</i> <sup>P</sup>            | acidic (leucine-rich) nuclear phosphoprotein 32 family | Regulation of histone acetylation and transcription                     |
| <i>Nme3</i> <sup>P</sup>              | expressed in non-metastatic cells                      | Transcriptional regulation                                              |
| <i>Zfp144</i> <sup>P</sup>            | zinc finger protein 144                                | Polycomb group. Transcriptional repression                              |
| <i>Stat6</i>                          | signal transducer and activator o                      | T-cell activation                                                       |
| <i>Cited2</i>                         | Cbp/p300-interacting transactivator                    | Transcriptional co-activator                                            |
| <i>Cebpb</i>                          | CCAAT/enhancer binding protein                         | Leucine zipper transcription factors, pro-inflammatory                  |
| <i>Klf4</i>                           | Kruppel-like factor 4 (gut)                            | Transcription factor, acts synergistically with Sp-1                    |
| <i>Klf13</i>                          | Kruppel-like factor 13                                 | Transcription factor expressed in activated T cells, NFkB pathways      |
| <i>Lims1l</i>                         | LIM and senescent cell antigen-1                       | LIM domains play key roles in regulating developmental pathways         |
| <i><sup>1</sup>Tieg</i>               | TGFB inducible early growth                            | Transcription factor / TGF-beta signaling pathway, analogous to SMAD    |
| <b>Oncogenes</b>                      |                                                        |                                                                         |
| <i>Fos</i>                            | FBJ osteosarcoma oncogene                              | Oncogene, signal transduction, transcription factor activator           |
| <i>Lyn</i>                            | Yamaguchi sarcoma viral oncogene homolog               | Oncogene, cellular homolog of v-Yes                                     |
| <i>Sfpi1</i>                          | SFFV proviral integration                              | Putative oncogene                                                       |
| <i>Nras</i>                           | neuroblastoma ras oncogene                             | Oncogene                                                                |
| <i>Rasa3</i>                          | RAS p21 protein activator 3                            | Stimulate intrinsic GTP-ase activities of normal RAS                    |
| <i>Hnrpa2b1</i>                       | heterogeneous nuclear ribonucleoprotein                | Mediates intracellular trafficking of specific RNAs                     |



Supplemental table 6. Genes associated with signaling whose expression was increased during CVB4 infection

| Gene name                           | Gene product                                                   | Relevant Function                                                                                                      |
|-------------------------------------|----------------------------------------------------------------|------------------------------------------------------------------------------------------------------------------------|
| <b>Cytoskeleton / signaling</b>     |                                                                |                                                                                                                        |
| <i>Cot11<sup>P</sup></i>            | coactosin-like 1 (Dictyostelium)                               | Actin binding                                                                                                          |
| <i>Gsn</i>                          | gelsolin                                                       | Cell proliferation, restructuring actin filaments                                                                      |
| <i>Msn</i>                          | moesin                                                         | Cell-to-cell junctions, cleavage furrows, cell division                                                                |
| <i>Capg</i>                         | capping protein (actin filament),                              | Actin-capping, cytoskeleton regulation                                                                                 |
| <i>Coro1c</i>                       | coronin, actin binding protein 1                               | Actin binding protein, cell adhesion , signal transduction                                                             |
| <i>Pstpip1</i>                      | proline-serine-threonine phosphatase interacting protein       | Actin cytoskeleton rearrangement, T cell activation                                                                    |
| <i>Cfl1</i>                         | cofilin 1, non-muscle                                          | Actin-binding protein, essential regulator of actin filament turnover                                                  |
| <i>Lasp1</i>                        | LIM and SH3 protein 1                                          | Actin-binding protein, role in cytoskeleton organization                                                               |
| <i>Actp7</i>                        | actin-crosslinking protein 7                                   |                                                                                                                        |
| <b>Calcium / Potassium</b>          |                                                                |                                                                                                                        |
| <i>Clca1<sup>P</sup></i>            | chloride channel calcium activated                             | Chloride channel                                                                                                       |
| <i>Clca1<sup>P</sup></i>            | chloride channel calcium activated                             | Ion channel. Signal transduction                                                                                       |
| <i>S100a10</i>                      | S100 calcium binding protein A1                                | Signal transduction                                                                                                    |
| <i>S100a4</i>                       | S100 calcium binding protein A4                                | Signal transduction                                                                                                    |
| <i>S100a6</i>                       | S100 calcium binding protein A6                                | Signal transduction                                                                                                    |
| <i>Cab39</i>                        | calcium binding protein, 39 kDa                                |                                                                                                                        |
| <i>Calu</i>                         | calumenin                                                      | Ca <sup>+</sup> binding protein that can be observed in the ER                                                         |
| <i>Mlp</i>                          | MARCKS-like protein                                            | Calmodulin-binding                                                                                                     |
| <i>Aplp2</i>                        | amyloid beta (A4) precursor-like                               | Role in calmodulin signal transduction                                                                                 |
| <i>Calm1</i>                        | calmodulin 1                                                   | Calcium regulation in skeletal muscles, liver, pancreas, heart                                                         |
| <i>Chgb</i>                         | chromogranin B                                                 | Ca <sup>++</sup> storage proteins, transcription factor                                                                |
| <i>Anxa2</i>                        | annexin A2                                                     | phospholipid/Ca <sup>2+</sup> binding protein, ECM formation; receptor for tPA                                         |
| <i>Anxa11</i>                       | annexin A11                                                    | Plasminogen receptor. Tissue remodeling                                                                                |
| <b>Signal transduction</b>          |                                                                |                                                                                                                        |
| <b>GTPases</b>                      |                                                                |                                                                                                                        |
| <i>Arhu<sup>P</sup></i>             | ras homolog gene family, member U                              | GTPase. Activates JNK pathway                                                                                          |
| <i>Iqgap1</i>                       | IQ motif containing GTPase activ                               | potential target of S100b during rearrangement of membrane morphology                                                  |
| <i>Cdc42</i>                        | cell division cycle 42 homolog (S                              | signals between cell surface receptor and actin cytoskeleton                                                           |
| <i>Arhgef3</i>                      | Rho guanine nucleotide exchange                                | activation of Rho GTPases                                                                                              |
| <b>G-protein coupled signaling</b>  |                                                                |                                                                                                                        |
| <i>Gnai2</i>                        | guanine nucleotide binding protein                             | G-protein family of signal transducers                                                                                 |
| <i>Gna13</i>                        | guanine nucleotide binding protein                             |                                                                                                                        |
| <i>Gnai2</i>                        | guanine nucleotide binding protein                             |                                                                                                                        |
| <i>Tm7sf1</i>                       | transmembrane 7 superfamily                                    | G-protein coupled receptor                                                                                             |
| <i>Arhgef1</i>                      | Rho guanine nucleotide exchange                                | G protein receptor signaling                                                                                           |
| <i>Gpcr25</i>                       | G-protein coupled receptor 25                                  | Induced during activation-induced apoptosis of T cells<br>Essential role in induction of apoptosis, coupling TCR / Fas |
| <i>Adrbk1</i>                       | adrenergic receptor kinase, beta                               | Promotes rapid receptor uncoupling from G proteins                                                                     |
| <b>Additional pathways</b>          |                                                                |                                                                                                                        |
| <i>Sh3yl1<sup>P</sup></i>           | Sh3 domain YSC-like 1                                          | Promotes Src kinase family signaling                                                                                   |
| <i>PDE9A<sup>P</sup></i>            | phosphodiesterase 9A homolog                                   | Regulates second messengers (cAMP, cGMP)                                                                               |
| <i>Nifie14-pending<sup>P7</sup></i> | transmembrane domain protein                                   | Signaling                                                                                                              |
| <i>Hrmt112 •</i>                    | heterogeneous nuclear ribonucleoprotein methyltransferase-like | RNA binding protein, signal transduction                                                                               |
| <i>Sh3bp2</i>                       | SH3-domain binding protein 2                                   | Protein-protein interactions, cytoplasmic signaling                                                                    |
| <i>Ddef1</i>                        | development and differentiation enhancing                      | Involved in differentiation                                                                                            |
| <i>Hcls1</i>                        | hematopoietic cell specific Lyn substrate 1                    | Signal transduction, regulation of gene expression                                                                     |
| <i>Ppap2a</i>                       | phosphatidic acid phosphatase 2a                               | Membrane bound protein with role in cell signaling?                                                                    |
| <i>Lrp1</i>                         | low density lipoprotein receptor-r                             | Binds intracellular adaptor proteins involved in cell signaling                                                        |

Supplemental table 7. Genes associated with cellular function whose expression was increased during CVB4 infection

| Gene name                                       | Gene product                                               |
|-------------------------------------------------|------------------------------------------------------------|
| <b>Organelles</b>                               |                                                            |
| <i>Bckdhb</i> <sup>P</sup>                      | branched chain ketoacid dehydrogenase E1, beta polypeptide |
| <i>Dbt</i> <sup>P</sup>                         | dihydrolipoamide branched chain transacylase E2            |
| <i>Grpel1</i> <sup>P</sup>                      | GrpE-like 1, mitochondrial                                 |
| <i>Ndufa6</i> <sup>P</sup>                      | NADH dehydrogenase                                         |
| <i>Rrbp1</i>                                    | ribosome binding protein 1                                 |
| <i>Atp6v1a1</i>                                 | ATPase, H+ transporting, V1 subunit A, isoform 1           |
| <i>Atp6ip1</i>                                  | ATPase, H+ transporting, lysosomal accessory protein 1     |
| <i>Atp6v1d</i>                                  | ATPase, H+ transporting, V1 subunit D                      |
| <i>Atp1b3</i>                                   | ATPase, Na+/K+ transporting, bet                           |
| <i>M6pr</i>                                     | mannose-6-phosphate receptor,                              |
| <i>Ces3</i>                                     | carboxylesterase 3                                         |
| <i>Cyp1b1</i>                                   | cytochrome P450, 1b1, benz[a]ant                           |
| <b>Protein Synthesis / Folding /Degradation</b> |                                                            |
| <i>Rpl13a</i> <sup>P</sup>                      | ribosomal protein L13a                                     |
| <i>Rnu22</i> <sup>P</sup>                       | RNA, U22 small nucleolar                                   |
| <i>Dnajb9</i> <sup>P</sup>                      | DnaJ (Hsp40) homolog, subfamily B, member 9                |
| <i>Hal</i> <sup>P</sup>                         | histidine ammonia lyase                                    |
| <i>Dnajc8</i>                                   | DnaJ (Hsp40) homolog, subfamily c, member 8                |
| <i>Acp2</i>                                     | acid phosphatase 2,                                        |
| <i>Ubc</i>                                      | ubiquitin C                                                |
| <i>Ubl3</i>                                     | ubiquitin-like 3                                           |
| <i>Ubc</i>                                      | ubiquitin C                                                |
| <i>Sf3b1</i>                                    | splicing factor 3b, subunit 1, 15                          |
| <i>Rbx1</i>                                     | ring-box 1                                                 |
| <b>Cytoskeleton</b>                             |                                                            |
| <i>Krt1-18</i> <sup>P</sup>                     | keratin complex 1                                          |
| <i>Adip</i> <sup>P</sup>                        | synovial sarcoma, X breakpoint 2-interacting protein       |
| <i>Dnchc1</i>                                   | dynein, cytoplasmic, heavy chain                           |
| <i>Kif5b</i>                                    | kinesin family member 5B                                   |
| <i>Nude</i> -pending                            | nuclear distribution gene                                  |
| <b>Cell function</b>                            |                                                            |
| <i>Gapd</i>                                     | glyceraldehyde-3-phosphate dehydrogenase                   |
| <i>Xdh</i>                                      | xanthine dehydrogenase                                     |
| <i>Tkt</i>                                      | transketolase                                              |
| <i>Mtm1</i>                                     | X-linked myotubular myopathy                               |
| <i>Adss1</i>                                    | adenylosuccinate synthetase 1                              |
| <i>Nudt9</i>                                    | nudix (nucleoside diphosphate linked moiety-X) type motif  |
| <i>Ampd3</i>                                    | AMP deaminase 3                                            |
| <i>Xrn1</i>                                     | 5'-3' exoribonuclease 1                                    |
| <i>Pk3</i>                                      | pyruvate kinase 3                                          |

Supplemental table 8. Genes that are specifically upregulated during CVB4-P infection

| Gene name                          | Gene product                                       | Relevant Function                                                         |
|------------------------------------|----------------------------------------------------|---------------------------------------------------------------------------|
| <b>Cell growth and development</b> |                                                    |                                                                           |
| <i>Nes</i>                         | nestin                                             | Embryogenesis. Marker of progenitor pancreas cell?                        |
| <i>Ngfa</i> •                      | nerve growth factor, alpha                         | Embryogenesis. Neurotrophin                                               |
| <i>Ngfg</i> •                      | nerve growth factor, gamma                         | Embryogenesis. Neurotrophin                                               |
| <i>Sellh</i>                       | Sell1 (suppressor of lin-12) 1 homolog             | Embryogenesis. Down-regulation of Notch system                            |
| <i>Mgat1</i>                       | mannoside acetylglucosaminyltransferase            | Embryogenesis. Required during morphogenesis                              |
| <i>Nupr1</i>                       | nuclear protein 1                                  | Growth promoting, expressed in regenerating pancreas                      |
| <i>Vnn1</i>                        | vanin 1                                            | Tissue regeneration                                                       |
| <i>Egf</i>                         | epidermal growth factor                            | Mitogenic. Liver regeneration                                             |
| <i>Vil</i>                         | villin                                             | Actin binding. Associated with differentiation                            |
| <sup>1</sup> <i>Pla2g1b</i>        | phospholipase A2, group IB, pancreas               | Stimulates DNA synthesis                                                  |
| <sup>1</sup> <i>Arg2</i>           | arginase type II                                   | Provides L-ornithine                                                      |
| <i>Aldh1a7</i>                     | aldehyde dehydrogenase family 1                    | Critical for normal development                                           |
| <sup>1</sup> <i>P2rx1</i>          | purinergic receptor P2X, ligand-g                  | Membrane ion channel                                                      |
| <i>Arhgdig</i> •                   | Rho GDP dissociation inhibitor                     | Growth inhibitory. Inhibitor of Rho family of proteins                    |
| <i>Birc4</i>                       | baculoviral IAP repeat-containing 4                | Caspase inhibitor. Inhibitor of apoptosis                                 |
| <i>Pawr</i>                        | PRKC, apoptosis WT1 regulator                      | Tissue remodeling                                                         |
| <i>Perp-pending</i>                | p53 apoptosis effector related to Pmp22            | Growth inhibitor                                                          |
| <sup>1</sup> <i>Reg3a</i> •        | regenerating islet-derived 3 alpha                 | Inhibits apoptosis                                                        |
| <i>Ang</i>                         | angiogenin                                         | Angiogenesis                                                              |
| <sup>1</sup> <i>Hpn</i>            | hepsin                                             | Vascular function and angiogenesis, blood coagulation                     |
| <i>Ramp1</i>                       | receptor (calcitonin) activity modifying protein 1 | Accessory protein for receptor that binds calcitonin gene-related peptide |
| <sup>1</sup> <i>P2rx1</i>          | purinergic receptor P2X, ligand-g                  | ATP-gated membrane ion channel                                            |
| <sup>1</sup> <i>Klk5</i> •         | kallikrein 5                                       | Kallikrein/kinin system. Kinins stimulate vascular growth                 |
| <sup>1</sup> <i>Serpina6</i>       | serine (or cysteine) proteinase                    | Serpin                                                                    |
| <sup>1</sup> <i>Serpina10</i>      | serine (or cysteine) proteinase                    | Serpin                                                                    |
| <sup>1</sup> <i>Ptger3</i> •       | prostaglandin E receptor 3 (subtype EP3)           | Signaling                                                                 |
| <b>Extracellular matrix</b>        |                                                    |                                                                           |
| <i>Vtn</i> •                       | vitronectin                                        | Extracellular matrix                                                      |
| <i>Gjb2</i>                        | gap junction membrane channel protein beta 2       | Gap junction                                                              |
| <i>Ctse</i>                        | cathepsin E                                        | Aspartic proteinase. Upregulated by IFN- $\gamma$ (Upregulates IL-2)      |
| <b>Gene expression</b>             |                                                    |                                                                           |
| <i>Foxa3</i>                       | forkhead box A3                                    | Transcription factor in pancreas                                          |
| <i>Ahcy</i>                        | S-adenosylhomocysteine hydrolase                   | Central role in methylation reactions                                     |
| <i>Nr5a2</i>                       | nuclear receptor subfamily 5, A2                   | Interacts with Dax-1. Transcriptional regulation                          |
| <i>Fkbp11</i>                      | FK506 binding protein 11                           | Transcription. Trafficking                                                |
| <i>Pole3</i>                       | polymerase (DNA directed), epsilon 3               | Interacts with nucleosomal structures                                     |
| <i>Polr2e</i>                      | polymerase (RNA) II (DNA directed)                 | Transcription                                                             |
| <i>Supt4h</i>                      | suppressor of Ty4 homolog                          | Chromatin formation and activity                                          |
| <i>Dmd</i>                         | dystrophin, muscular dystrophy                     | Signal transduction. Cytoskeleton                                         |
| <i>Nucb2</i>                       | nucleobindin 2                                     | Binds calcium; calcium homeostasis                                        |
| <i>Kcnj15</i>                      | potassium inwardly-rectifying channel              | Potassium channel                                                         |
| <i>Wbp5</i>                        | WW domain binding protein 5                        | Protein-protein interaction                                               |
| <i>Als2</i>                        | amyotrophic lateral sclerosis 2                    | Cell signaling. Mutation linked to juvenile ALS                           |
| <i>Gna14</i>                       | guanine nucleotide binding protein                 | Signal transduction. Hematopoietic cell differentiation                   |
| <i>Srcasm</i>                      | Src activating and signaling molecule              | Promotes Src kinase family signaling                                      |

Supplemental table 8 (ctd). Genes that are specifically upregulated during CVB4-P infection

| Gene name                           | Gene product                                                   | Relevant Function                                      |
|-------------------------------------|----------------------------------------------------------------|--------------------------------------------------------|
| <b>Immune Responses</b>             |                                                                |                                                        |
| <sup>1</sup> <i>Pla2g1b</i>         | phospholipase A2, group IB, pancreas                           | Role in regulating inflammation                        |
| <sup>1</sup> <i>Klk5</i> •          | kallikrein 5                                                   | Released during inflammation                           |
| <sup>1</sup> <i>Klk6,9,13,16,26</i> | kallikreins                                                    | Released during inflammation                           |
| <sup>1</sup> <i>Reg3a</i> •         | regenerating islet-derived 3 alpha                             |                                                        |
| <i>Irf6</i>                         | interferon regulatory factor 6                                 | Transcription factor                                   |
| <i>C4bp</i>                         | complement component 4 binding protein                         | Regulates C' cascade                                   |
| <sup>1</sup> <i>Ptger3</i> •        | prostaglandin E receptor 3 (subtype EP3)                       | Pro-inflammatory; mast cell activation                 |
| <sup>1</sup> <i>Arg2</i>            | arginase type II                                               | M2 / Th2                                               |
| <i>H2-Ea</i> •                      | histocompatibility 2, class II antigen<br>E alpha              | Antigen presentation to Th cells                       |
| <i>Igh-VS107</i>                    | immunoglobulin heavy chain (S107 family)                       | B cells. Superantibody                                 |
| <b>Tissue injury and response</b>   |                                                                |                                                        |
| <sup>1</sup> <i>Ptger3</i> •        | prostaglandin E receptor 3 (subtype EP3)                       | Protects against injury                                |
| <sup>1</sup> <i>Gamt</i>            | guanidinoacetate methyltransferase                             | Protects against tissue injury                         |
| <sup>1</sup> <i>Gatm</i>            | glycine amidinotransferase                                     | Protects against tissue injury                         |
| <i>Gif</i>                          | gastric intrinsic factor                                       | Cobalt ion transport; absorption of food               |
| <i>LOC228816</i>                    | similar to putative "-mannosidase                              | Carbohydrate metabolism                                |
| <i>Lcat</i>                         | lecithin cholesterol acyltransferase                           | Cholesterol metabolism                                 |
| <b>Cell function</b>                |                                                                |                                                        |
| <i>Phgdh</i>                        | 3-phosphoglycerate dehydrogenase                               | Oxidoreductase                                         |
| <i>Mrpl53</i>                       | mitochondrial ribosomal protein                                | Mitochondria ribosome                                  |
| <i>Ak3l</i>                         | adenylate kinase 3 alpha like                                  | Mitochondrial matrix protein                           |
| <i>Bckdha</i>                       | branched chain ketoacid dehydrogenase E1,<br>alpha polypeptide | Oxido-reductase activity                               |
| <i>Rps4x</i>                        | ribosomal protein S4, X-linked                                 | Ribosome                                               |
| <i>Ggh</i>                          | gamma-glutamyl hydrolase                                       | Lysosome                                               |
| <i>Eif2b</i>                        | eukaryotic translation initiation factor 2B                    | Protein synthesis                                      |
| <i>Wars</i>                         | tryptophanyl-tRNA synthetase                                   | Protein synthesis                                      |
| <i>Psm3</i>                         | proteasome                                                     | Protein degradation                                    |
| <i>Ubd</i>                          | ubiquitin d                                                    | Protein degradation                                    |
| <i>Aqp8</i>                         | aquaporin 8                                                    | Water, small solute transport                          |
| <i>Slc22a1</i>                      | solute carrier family 22                                       | Ion transport                                          |
| <i>Slc41a1</i>                      | solute carrier family 41                                       | Ion transport                                          |
| <i>Pcbd</i>                         | 6-pyruvoyl-tetrahydropterin synthase                           | Catabolism                                             |
| <b>Functional pancreas</b>          |                                                                |                                                        |
| <i>Rib1</i>                         | ribonuclease 1, pancreatic                                     | Pancreatic enzyme                                      |
| <i>Pnliprp2</i> •                   | pancreatic lipase-related protein 2                            | Pancreatic enzyme                                      |
| <i>Pnliprp1</i>                     | pancreatic lipase related protein 1                            | Pancreatic enzyme                                      |
| <i>Trypsin16</i>                    | trypsinogen 16                                                 | Pancreatic enzyme                                      |
| <i>Ctrl</i>                         | chymotrypsin-like                                              | Pancreatic enzyme                                      |
| <i>Cpn1</i>                         | carboxypeptidase N, polypeptide 1                              | Pancreatic enzyme                                      |
| <i>Lypla1</i>                       | lysophospholipase 1                                            | Pancreatic enzyme                                      |
| <sup>1</sup> <i>Pla2g1b</i>         | phospholipase A2, group IB, pancreas                           | Pancreatic enzyme                                      |
| <i>Rab3d</i>                        | RAB3D, member RAS oncogene family                              | Localized to secretory granules, role in exocytosis    |
| <i>Cckar</i> •                      | cholecystokinin A receptor                                     | Secretion                                              |
| <i>Crpd</i>                         | crp-ductin                                                     | Mucin-like glycoprotein, expressed in pancreatic ducts |
| <sup>1</sup> <i>P2rx1</i>           | purinergic receptor P2X, ligand-g                              | ATP-gated membrane ion channel                         |

Supplemental table 9. Genes that are specifically upregulated during CVB4-V infection

| Gene name                          | Gene product                                                                                | Relevant Function                                     |
|------------------------------------|---------------------------------------------------------------------------------------------|-------------------------------------------------------|
| <b>Cell Growth and Development</b> |                                                                                             |                                                       |
| <i>H19</i>                         | H19 fetal liver mRNA                                                                        | Embryogenesis. Essential role in development          |
| <i>Bag3</i>                        | Bcl2-associated athanogene 3                                                                | Synergy with Bcl-2 to prevent apoptosis               |
| <b>Extracellular Matrix</b>        |                                                                                             |                                                       |
| <i>Tnxb</i>                        | tenascin XB                                                                                 | ECM protein. Regulate collagen synthesis / deposition |
| <i>Mmp12</i>                       | matrix metalloproteinase 12                                                                 | ECM breakdown/ remodeling                             |
| <i>Itga5</i>                       | integrin alpha 5                                                                            | Cell spreading/adhesion, fibrosis formation           |
| <b>Gene Expression</b>             |                                                                                             |                                                       |
| <i>Sox18</i>                       | SRY-box containing gene 18                                                                  | Transactivator of gene expression                     |
| <i>Nfib</i>                        | nuclear factor I/B                                                                          | Transcription factor. Cell growth and development     |
| <i>Nfix</i>                        | nuclear factor I/X                                                                          | Transcription factor. Cell growth and development     |
| <i>Atf3</i>                        | activating transcription factor 3                                                           | Transcription factor. Transcriptional repressor       |
| <i>Temt</i>                        | thioether S-methyltransferase                                                               | Methylation                                           |
| <i>Fliih</i>                       | flightless I homolog                                                                        | Gelsolin family; actin organization                   |
| <i>Kcnn4</i>                       | potassium intermediate/small conductance Ca <sup>2+</sup> -activated K <sup>+</sup> channel | Ca <sup>2+</sup> -activated K <sup>+</sup> channel    |
| <i>Ptrn8</i>                       | protein tyrosine phosphatase, non-receptor type 8                                           | Signal transduction through the src homology region   |
| <i>Emk</i>                         | ELKL motif kinase                                                                           | Serine/threonine kinases                              |
| <b>Immune Responses</b>            |                                                                                             |                                                       |
| <i>Cish3</i><br>( <i>SOCS3</i> )   | cytokine inducible SH2-containing                                                           | Suppresses JAK/STAT. Increases protein degradation    |
| <i>Marco</i>                       | macrophage receptor with collagen transporter 2                                             |                                                       |
| <i>Tap2</i>                        |                                                                                             | Antigen processing                                    |
| <b>Tissue injury and response</b>  |                                                                                             |                                                       |
| <i>Vwf</i>                         | Von Willebrand factor homolog                                                               | Proteinase that participates in blood coagulation     |
| <i>Aqp1</i>                        | aquaporin 1                                                                                 | Edema. Role in CO <sub>2</sub> exchange               |
| <i>Prdx2</i>                       | peroxiredoxin 2                                                                             | Protects from oxidative damage                        |
| <i>Dpm2</i>                        | dolichol-phosphate (beta-D)                                                                 | Carbohydrate metabolism                               |
| <i>Facl2</i>                       | fatty acid Coenzyme A ligase                                                                | Fatty acid metabolism                                 |
| <b>Cell function</b>               |                                                                                             |                                                       |
| <i>Mtap4</i>                       | microtubule-associated protein 4                                                            | Microtubules                                          |
| <i>Dpep1</i>                       | dipeptidase 1 (renal)                                                                       | Hydrolyses dipeptides                                 |
| <i>Adh1</i>                        | alcohol dehydrogenase 1                                                                     | Alcohol/aldehyde interconversions, expressed in liver |
